# Supplementary material for: Deterministic processes vary during community assembly for ecologically dissimilar taxa
Source: PubMed Central journal article supplement (PMC4600744; doi:10.1038/ncomms9444), 2015-10-05
Supplement: ncomms9444-s1.pdf [file ncomms9444-s1.pdf]

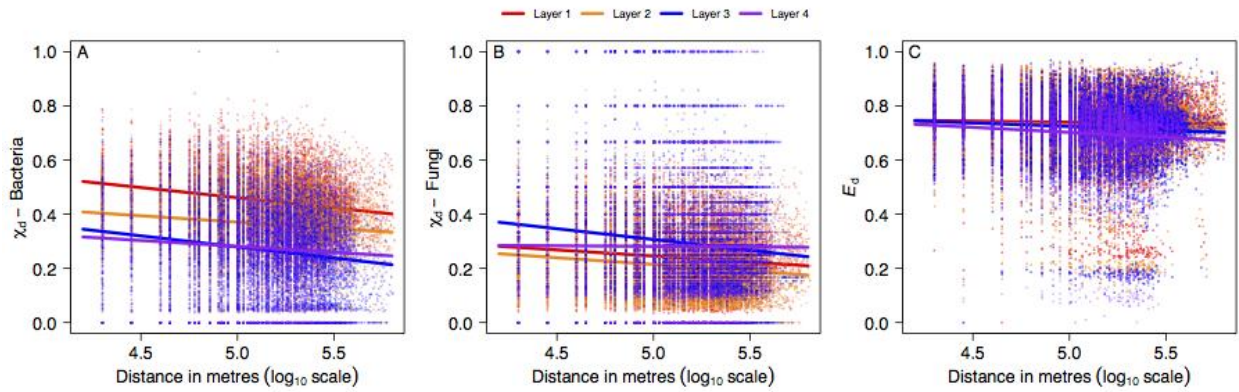

**Supplementary Figure 1. Community and habitat turnover with increasing geographic distance at the scale of Scotland. Pairwise community similarities ( $X_d$ ) are based on the Sorensen index for bacteria (A) and fungi (B) while pairwise habitat similarities ( $E_d$ ) are based on Euclidean distances (C). Distances and linear relationships within each soil layer are indicated by colour, and the shaded region represents the 95% confidence limits on the regression estimates. Model coefficients are provided in Supplementary Table 1.**

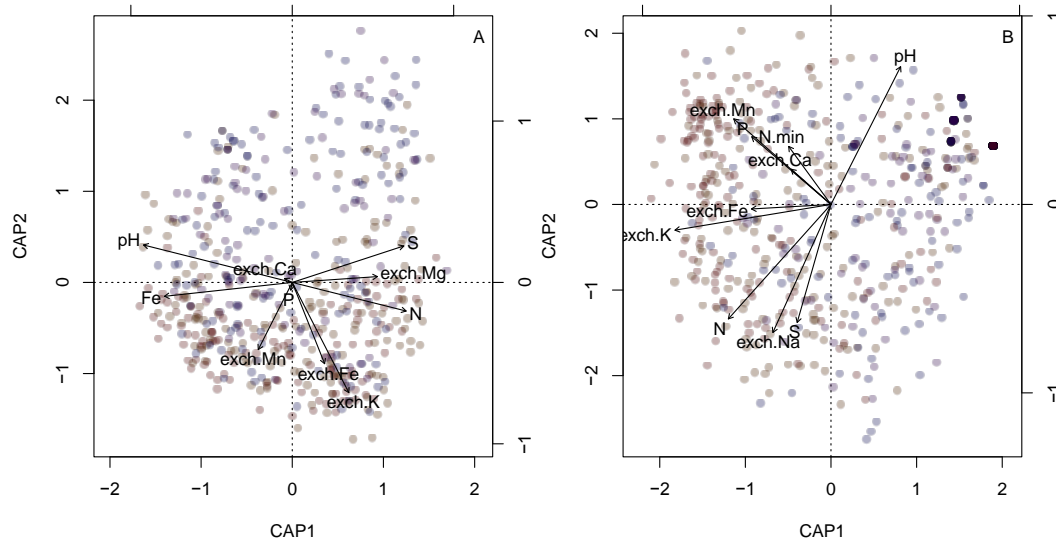

**Supplementary Figure 2. Constrained analyses of principal coordinates for bacterial (A) and fungal (B) communities, using the top ten most important environmental variables for predicting community composition for each microbial group. Colours refer to the soil layers from which the communities were sampled (see Supplementary Fig. 1). The ten constraining variables pictured in each panel explained 13.2 % and 12.9 % of variation in bacterial and fungal communities, respectively. For comparison, using all 51 environmental variables that were measured on individual soil samples explained 22.6 % and 21.2 % of variation, while including additional site variables (altitude, slope, drainage, temperature, precipitation, and maximum rooting depth) explained 32.0 % and 29.9 % of variation in bacterial and fungal communities, respectively.**

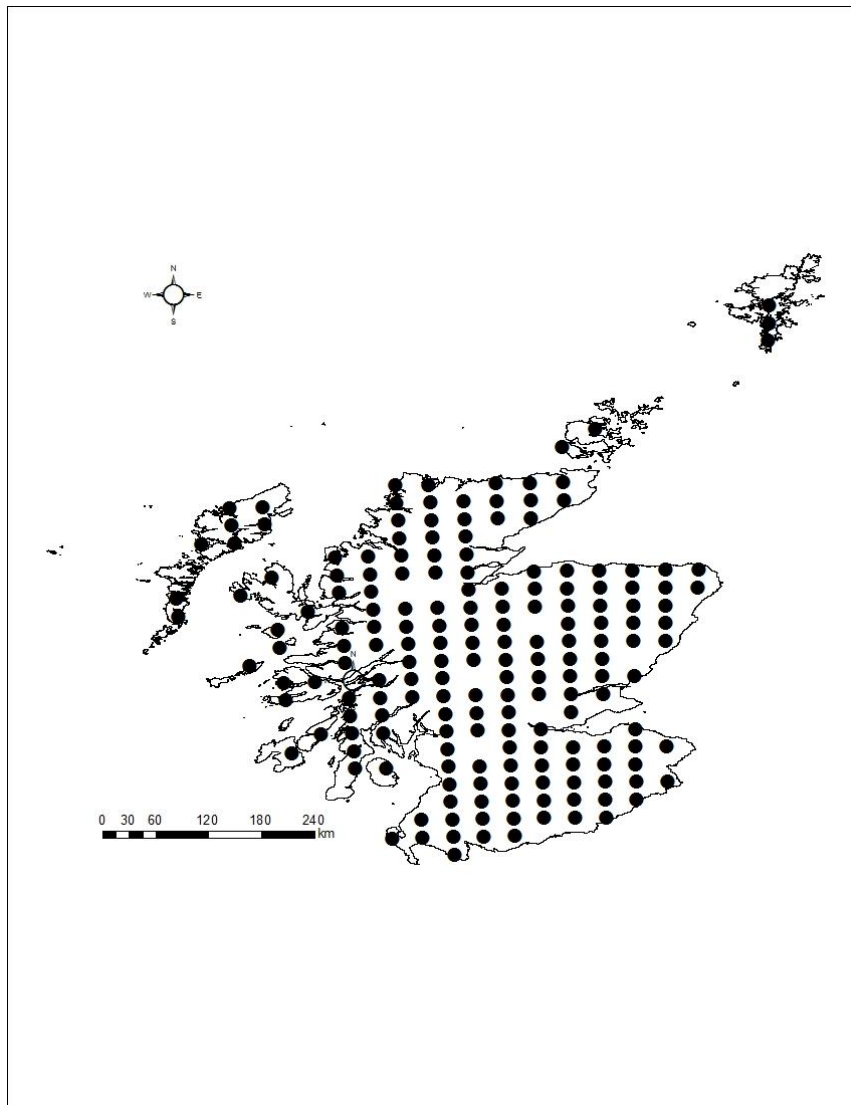

**Supplementary Figure 3. Locations of sampling points distributed along a 20km grid across the whole of Scotland. More detailed maps, including land use categories, can be found in Yao et al.<sup>6</sup>.**

**Supplementary Table 1. Estimated model parameters associated with community and habitat turnover at the scale of Scotland. The intercept reflects the mean pairwise similarity and  $z$  reflects the strength of the TAR/HAR pictured in Figure 1. Parameters were estimated and  $P$ -values calculated based on type II linear regression estimated using ordinary least squares. \*\*\* $P < 0.001$ , \*\* $P < 0.01$ , ns: non-significant.**

| Response matrix | Soil layer | Intercept | Lower CI | Upper CI | Slope | Lower CI | Upper CI | $P$ -value |
|-----------------|------------|-----------|----------|----------|-------|----------|----------|------------|
| Bacteria        | L1         | 0.448     | 0.446    | 0.450    | 0.038 | 0.034    | 0.041    | ***        |
|                 | L2         | 0.363     | 0.361    | 0.365    | 0.023 | 0.020    | 0.027    | ***        |
|                 | L3         | 0.265     | 0.262    | 0.268    | 0.041 | 0.035    | 0.047    | ***        |
|                 | L4         | 0.274     | 0.268    | 0.279    | 0.022 | 0.012    | 0.031    | ***        |
| Fungi           | L1         | 0.238     | 0.236    | 0.240    | 0.023 | 0.018    | 0.027    | ***        |
|                 | L2         | 0.206     | 0.204    | 0.208    | 0.025 | 0.021    | 0.028    | ***        |
|                 | L3         | 0.293     | 0.289    | 0.297    | 0.040 | 0.033    | 0.047    | ***        |
|                 | L4         | 0.281     | 0.274    | 0.287    | 0.002 | -0.009   | 0.013    | ns         |
| Environment     | L1         | 0.738     | 0.737    | 0.740    | 0.004 | 0.001    | 0.007    | **         |
|                 | L2         | 0.727     | 0.726    | 0.729    | 0.008 | 0.006    | 0.010    | ***        |
|                 | L3         | 0.719     | 0.718    | 0.721    | 0.013 | 0.011    | 0.016    | ***        |
|                 | L4         | 0.696     | 0.693    | 0.699    | 0.019 | 0.013    | 0.024    | ***        |

**Supplementary Table 2: Estimated spatially correlated random effect terms for fungal communities.**

| Layer | PC | Nugget | Sill  | Nugget/Sill*100 | Range (m) |
|-------|----|--------|-------|-----------------|-----------|
| 1     | 1  | 0.003  | 0.008 | 37.50           | 200000    |
|       | 2  | 0.005  | 0.008 | 62.50           | 200000    |
|       | 3  | 0.005  | 0.007 | 71.43           | 200000    |
|       | 4  | 0.005  | 0.008 | 62.50           | 100000    |
|       | 5  | 0.005  | 0.008 | 62.50           | 20000     |
| 2     | 1  | 0.004  | 0.006 | 66.67           | 200000    |
|       | 2  | 0.003  | 0.006 | 50.00           | 200000    |
|       | 3  | 0.005  | 0.006 | 83.33           | 100000    |
|       | 4  | 0.005  | 0.006 | 83.33           | 200000    |
|       | 5  | 0.006  | 0.006 | 100.00          | 237093    |
| 3     | 1  | 0.002  | 0.004 | 50.00           | 50000     |
|       | 2  | 0.002  | 0.008 | 25.00           | 200000    |
|       | 3  | 0.004  | 0.006 | 66.67           | 100000    |
|       | 4  | 0.005  | 0.006 | 83.33           | 50000     |
|       | 5  | 0.005  | 0.006 | 83.33           | 50000     |
| 4     | 1  | 0.055  | 0.06  | 91.67           | 150000    |
|       | 2  | 0.022  | 0.039 | 56.41           | 100000    |
|       | 3  | 0.034  | 0.036 | 94.44           | 64968     |
|       | 4  | 0.027  | 0.032 | 84.38           | 150000    |
|       | 5  | 0.022  | 0.027 | 81.48           | 100000    |

**Supplementary Table 3: Estimated spatially correlated random effect terms for bacterial communities.**

| Layer | PC | Nugget | Sill  | Nugget/Sill*100 | Range (m) |
|-------|----|--------|-------|-----------------|-----------|
| 1     | 1  | 0.004  | 0.008 | 50.00           | 200000    |
|       | 2  | 0.005  | 0.007 | 71.43           | 200000    |
|       | 3  | 0.005  | 0.008 | 62.50           | 50000     |
|       | 4  | 0.005  | 0.008 | 62.50           | 100000    |
|       | 5  | 0.006  | 0.008 | 75.00           | 50000     |
| 2     | 1  | 0.005  | 0.006 | 83.33           | 150000    |
|       | 2  | 0.004  | 0.006 | 66.67           | 200000    |
|       | 3  | 0.005  | 0.006 | 83.33           | 150000    |
|       | 4  | 0.005  | 0.006 | 83.33           | 50000     |
|       | 5  | 0.005  | 0.006 | 83.33           | 100000    |
| 3     | 1  | 0.005  | 0.007 | 71.43           | 100000    |
|       | 2  | 0.005  | 0.007 | 71.43           | 100000    |
|       | 3  | 0.005  | 0.007 | 71.43           | 50000     |
|       | 4  | 0.004  | 0.007 | 57.14           | 50000     |
|       | 5  | 0.005  | 0.007 | 71.43           | 50000     |
| 4     | 1  | 0.008  | 0.013 | 61.54           | 150000    |
|       | 2  | 0.009  | 0.012 | 75.00           | 50000     |
|       | 3  | 0.009  | 0.012 | 75.00           | 50000     |
|       | 4  | 0.007  | 0.012 | 58.33           | 50000     |
|       | 5  | 0.01   | 0.012 | 83.33           | 50000     |

**Supplementary Table 4: Estimated spatially correlated random effect terms for environmental variables.**

| Layer | PC | Nugget | Sill  | Nugget/Sill*100 | Range (m) |
|-------|----|--------|-------|-----------------|-----------|
| 1     | 1  | 0.12   | 0.282 | 42.55           | 200000    |
|       | 2  | 0.12   | 0.166 | 72.29           | 200000    |
|       | 3  | 0.07   | 0.25  | 28.00           | 50000     |
|       | 4  | 0.08   | 0.355 | 22.54           | 200000    |
|       | 5  | 0.22   | 0.232 | 94.83           | 149787    |
| 2     | 1  | 0.19   | 0.303 | 62.71           | 150000    |
|       | 2  | 0.13   | 0.245 | 53.06           | 50000     |
|       | 3  | 0.16   | 0.302 | 52.98           | 150000    |
|       | 4  | 0.08   | 0.314 | 25.48           | 200000    |
|       | 5  | 0.22   | 0.267 | 82.40           | 100000    |
| 3     | 1  | 0.16   | 0.353 | 45.33           | 150000    |
|       | 2  | 0.19   | 0.262 | 72.52           | 200000    |
|       | 3  | 0.19   | 0.349 | 54.44           | 150000    |
|       | 4  | 0.07   | 0.367 | 19.07           | 200000    |
|       | 5  | 0.21   | 0.25  | 84.00           | 50000     |
| 4     | 1  | 0.11   | 0.242 | 45.45           | 150000    |
|       | 2  | 0.12   | 0.254 | 47.24           | 100000    |
|       | 3  | 0.14   | 0.434 | 32.26           | 150000    |
|       | 4  | 0.04   | 0.561 | 7.13            | 200000    |
|       | 5  | 0      | 0.284 | 0.00            | 28843     |

**Supplementary Table 5. Estimated model parameters associated with relationships between community turnover and habitat turnover. Habitat turnover was estimated from the full set of 51 environmental variables measured independently for each soil layer. Two relationships are presented: the first compares mean levels of community ( $\chi$ ) and habitat ( $E_d$ ) similarity within each neighbourhood and the second compares the strength of the TAR and HAR ( $z$ ) within each neighbourhood. Parameters were estimated and  $P$ -values calculated based on type II linear regression estimated using ordinary least squares.**

| Response matrix | Relationship                                   | Soil layer | Intercept | Lower CI | Upper CI | Slope | Lower CI | Upper CI | $P$ -value | $R^2$ |       |
|-----------------|------------------------------------------------|------------|-----------|----------|----------|-------|----------|----------|------------|-------|-------|
| Bacteria        | $\chi_{\text{community}} \sim E_d$             | L1         | 0.056     | -0.155   | 0.267    | 0.545 | 0.272    | 0.819    | 0.001      | 0.120 |       |
|                 |                                                | L2         | 0.067     | -0.239   | 0.373    | 0.410 | 0.003    | 0.818    | 0.029      | 0.025 |       |
|                 |                                                | L3         |           | -0.421   | -0.802   | 0.040 | 0.948    | 0.436    | 1.460      | 0.001 | 0.096 |
|                 |                                                | L4         | -0.365    | -0.872   | 0.141    | 0.908 | 0.205    | 1.611    | 0.007      | 0.081 |       |
|                 | $z_{\text{community}} \sim z_{\text{habitat}}$ | L1         | 0.022     | 0.013    | 0.031    | 0.452 | 0.259    | 0.646    | 0.001      | 0.144 |       |
|                 |                                                | L2         | 0.018     | 0.010    | 0.025    | 0.247 | 0.064    | 0.431    | 0.006      | 0.041 |       |
|                 |                                                | L3         | 0.020     | 0.005    | 0.035    | 0.381 | 0.066    | 0.696    | 0.008      | 0.040 |       |
|                 |                                                | L4         | 0.028     | 0.012    | 0.045    | 0.450 | 0.146    | 0.753    | 0.001      | 0.095 |       |
| Fungi           | $\chi_{\text{community}} \sim E_d$             | L1         | -0.214    | -0.432   | 0.004    | 0.618 | 0.335    | 0.901    | 0.001      | 0.138 |       |
|                 |                                                | L2         | -0.093    | -0.282   | 0.096    | 0.430 | 0.178    | 0.682    | 0.002      | 0.068 |       |
|                 |                                                | L3         | 0.023     | -0.498   | 0.544    | 0.406 | -0.292   | 1.104    | 0.144      | 0.009 |       |
|                 |                                                | L4         | -0.047    | -0.639   | 0.546    | 0.447 | -0.357   | 1.250    | 0.134      | 0.015 |       |
|                 | $z_{\text{community}} \sim z_{\text{habitat}}$ | L1         | 0.020     | 0.009    | 0.030    | 0.442 | 0.235    | 0.648    | 0.001      | 0.122 |       |
|                 |                                                | L2         | 0.017     | 0.007    | 0.027    | 0.397 | 0.162    | 0.631    | 0.002      | 0.061 |       |
|                 |                                                | L3         | 0.031     | 0.015    | 0.046    | 0.358 | -0.002   | 0.719    | 0.026      | 0.024 |       |
|                 |                                                | L4         | 0.046     | 0.020    | 0.073    | 0.144 | -0.350   | 0.639    | 0.278      | 0.004 |       |



**Supplementary Table 6: Estimated model parameters associated with relationships between community turnover and habitat turnover. Habitat turnover was estimated from all environmental variables measured independently for each soil layer and categorical data collected at the site level (altitude, slope, drainage, temperature, precipitation, and maximum rooting depth). Two relationships are presented: the first compares mean levels of community ( $\chi$ ) and habitat ( $E_d$ ) similarity within each neighbourhood and the second compares the strength of the TAR and HAR ( $z$ ) within each neighbourhood. Parameters were estimated and  $P$ -values calculated based on type II linear regression estimated using ordinary least squares.**

| Response matrix | Relationship                                   | Soil layer | Intercept | Lower CI | Upper CI | Slope | Lower CI | Upper CI | $P$ -value | $R^2$ |
|-----------------|------------------------------------------------|------------|-----------|----------|----------|-------|----------|----------|------------|-------|
| Bacteria        | $\chi_{\text{community}} \sim E_d$             | L1         | 0.118     | -0.074   | 0.309    | 0.468 | 0.218    | 0.718    | 0.001      | 0.107 |
|                 |                                                | L2         | 0.134     | -0.168   | 0.436    | 0.322 | -0.081   | 0.725    | 0.061      | 0.016 |
|                 |                                                | L3         | -0.249    | -0.631   | 0.132    | 0.718 | 0.207    | 1.230    | 0.006      | 0.058 |
|                 |                                                | L4         | -0.431    | -0.948   | 0.087    | 0.996 | 0.279    | 1.713    | 0.004      | 0.094 |
|                 | $z_{\text{community}} \sim z_{\text{habitat}}$ | L1         | 0.022     | 0.013    | 0.031    | 0.471 | 0.281    | 0.662    | 0.001      | 0.159 |
|                 |                                                | L2         | 0.019     | 0.011    | 0.026    | 0.227 | 0.045    | 0.410    | 0.006      | 0.035 |
|                 |                                                | L3         | 0.021     | 0.006    | 0.035    | 0.372 | 0.053    | 0.691    | 0.013      | 0.037 |
|                 |                                                | L4         | 0.029     | 0.012    | 0.046    | 0.446 | 0.138    | 0.754    | 0.002      | 0.091 |
| Fungi           | $\chi_{\text{community}} \sim E_d$             | L1         | -0.267    | -0.480   | -0.053   | 0.686 | 0.408    | 0.964    | 0.001      | 0.169 |
|                 |                                                | L2         | -0.132    | -0.322   | 0.059    | 0.479 | 0.226    | 0.732    | 0.001      | 0.081 |
|                 |                                                | L3         | 0.051     | -0.461   | 0.562    | 0.368 | -0.316   | 1.052    | 0.153      | 0.008 |
|                 |                                                | L4         | 0.130     | -0.412   | 0.673    | 0.209 | -0.525   | 0.944    | 0.277      | 0.004 |
|                 | $z_{\text{community}} \sim z_{\text{habitat}}$ | L1         | 0.019     | 0.009    | 0.029    | 0.456 | 0.250    | 0.661    | 0.001      | 0.130 |
|                 |                                                | L2         | 0.017     | 0.008    | 0.027    | 0.393 | 0.159    | 0.627    | 0.002      | 0.061 |
|                 |                                                | L3         | 0.030     | 0.014    | 0.045    | 0.391 | 0.035    | 0.746    | 0.019      | 0.030 |
|                 |                                                | L4         | 0.046     | 0.020    | 0.072    | 0.160 | -0.331   | 0.652    | 0.277      | 0.005 |

**Supplementary Table 7: Estimated model parameters associated with relationships between community turnover and habitat turnover. Habitat turnover was estimated from the ten most important environmental variables, measured independently for each soil layer, for explaining variation in bacterial or fungal community composition (analysed separately, Supplementary Fig. 2). Two relationships are presented: the first compares mean levels of community ( $\chi$ ) and habitat ( $E_d$ ) similarity within each neighbourhood and the second compares the strength of the TAR and HAR ( $z$ ) within each neighbourhood. Parameters were estimated and  $P$ -values calculated based on type II linear regression estimated using ordinary least squares.**

| Response matrix | Relationship                                   | Soil layer | Intercept | Lower CI | Upper CI | Slope | Lower CI | Upper CI | $P$ -value | $R^2$ |
|-----------------|------------------------------------------------|------------|-----------|----------|----------|-------|----------|----------|------------|-------|
| Bacteria        | $\chi_{\text{community}} \sim E_d$             | L1         | 0.231     | 0.139    | 0.323    | 0.418 | 0.261    | 0.574    | 0.001      | 0.188 |
|                 |                                                | L2         | 0.204     | 0.047    | 0.361    | 0.271 | 0.025    | 0.517    | 0.026      | 0.028 |
|                 |                                                | L3         | 0.158     | -0.015   | 0.330    | 0.227 | -0.075   | 0.529    | 0.071      | 0.017 |
|                 |                                                | L4         | 0.119     | -0.113   | 0.352    | 0.302 | -0.117   | 0.720    | 0.088      | 0.026 |
|                 | $z_{\text{community}} \sim z_{\text{habitat}}$ | L1         | 0.020     | 0.012    | 0.028    | 0.445 | 0.307    | 0.584    | 0.001      | 0.242 |
|                 |                                                | L2         | 0.014     | 0.007    | 0.020    | 0.484 | 0.323    | 0.645    | 0.001      | 0.174 |
|                 |                                                | L3         | 0.011     | -0.002   | 0.025    | 0.623 | 0.379    | 0.867    | 0.001      | 0.156 |
|                 |                                                | L4         | 0.040     | 0.024    | 0.057    | 0.063 | -0.199   | 0.325    | 0.296      | 0.003 |
| Fungi           | $\chi_{\text{community}} \sim E_d$             | L1         | -0.016    | -0.117   | 0.085    | 0.449 | 0.285    | 0.612    | 0.001      | 0.191 |
|                 |                                                | L2         | 0.040     | -0.071   | 0.152    | 0.275 | 0.112    | 0.438    | 0.001      | 0.062 |
|                 |                                                | L3         | 0.148     | -0.102   | 0.397    | 0.275 | -0.110   | 0.661    | 0.089      | 0.013 |
|                 |                                                | L4         | 0.286     | 0.060    | 0.511    | 0.003 | -0.385   | 0.390    | 0.467      | 0.000 |
|                 | $z_{\text{community}} \sim z_{\text{habitat}}$ | L1         | 0.017     | 0.007    | 0.027    | 0.391 | 0.237    | 0.545    | 0.001      | 0.163 |
|                 |                                                | L2         | 0.012     | 0.003    | 0.021    | 0.681 | 0.424    | 0.938    | 0.001      | 0.138 |
|                 |                                                | L3         | 0.027     | 0.012    | 0.041    | 0.666 | 0.321    | 1.011    | 0.001      | 0.086 |
|                 |                                                | L4         | 0.040     | 0.017    | 0.063    | 0.466 | 0.069    | 0.864    | 0.014      | 0.056 |

**Supplementary Table 8: Number of samples associated with each land use category**

| Response matrix | Layer | Arable | Improved Grassland | Semi-natural Grassland | Woodland | Moorland | Bog |
|-----------------|-------|--------|--------------------|------------------------|----------|----------|-----|
| Bacteria        | 1     | 17     | 28                 | 22                     | 10       | 32       | 23  |
|                 | 2     | 14     | 26                 | 30                     | 29       | 37       | 35  |
|                 | 3     | 10     | 16                 | 26                     | 27       | 30       | 33  |
|                 | 4     | 3      | 7                  | 15                     | 22       | 22       | 16  |
| Fungi           | 1     | 17     | 28                 | 22                     | 11       | 32       | 24  |
|                 | 2     | 15     | 27                 | 31                     | 29       | 38       | 35  |
|                 | 3     | 12     | 25                 | 29                     | 27       | 32       | 32  |
|                 | 4     | 3      | 12                 | 16                     | 24       | 24       | 15  |

**Supplementary Table 9. Estimated parameters associated with the neutral model of biodiversity, fit at the level of Scotland, for bacterial communities described within each soil layer and within each land use category.**

| Land use               | Soil layer | <i>theta</i> | <i>I</i> (median) | <i>I</i> (IQR) |
|------------------------|------------|--------------|-------------------|----------------|
| Arable                 | 1          | 35.76        | 27.40             | 10.10          |
|                        | 2          | 56.62        | 19.30             | 5.49           |
|                        | 3          | 33.57        | 1.37              | 24.00          |
|                        | 4          | 148.33       | 6.60              | 1.63           |
| Improved Grassland     | 1          | 38.80        | 25.08             | 4.31           |
|                        | 2          | 36.49        | 22.42             | 19.59          |
|                        | 3          | 38.62        | 10.19             | 18.91          |
|                        | 4          | 29.60        | 3.66              | 7.43           |
| Semi-natural Grassland | 1          | 34.26        | 18.62             | 5.01           |
|                        | 2          | 40.79        | 16.21             | 8.75           |
|                        | 3          | 45.16        | 10.97             | 6.72           |
|                        | 4          | 53.02        | 13.07             | 9.80           |
| Woodland               | 1          | 23.84        | 17.23             | 3.05           |
|                        | 2          | 22.21        | 16.46             | 7.11           |
|                        | 3          | 33.59        | 14.37             | 13.79          |
|                        | 4          | 39.69        | 14.46             | 11.07          |
| Moorland               | 1          | 24.06        | 21.76             | 12.74          |
|                        | 2          | 27.71        | 19.30             | 11.23          |
|                        | 3          | 32.28        | 14.73             | 10.99          |
|                        | 4          | 37.44        | 19.39             | 12.49          |
| Bog                    | 1          | 21.99        | 27.00             | 11.80          |
|                        | 2          | 24.65        | 18.91             | 15.67          |
|                        | 3          | 22.16        | 13.91             | 7.94           |
|                        | 4          | 26.09        | 11.62             | 9.07           |

**Supplementary Table 10. Estimated parameters associated with the neutral model of biodiversity, fit at the level of Scotland, for fungal communities described within each soil layer and within each land use category.**

| Land use               | Soil layer | <i>theta</i> | <i>I</i> (median) | <i>I</i> (IQR) |
|------------------------|------------|--------------|-------------------|----------------|
| Arable                 | 1          | 33.80        | 14.04             | 10.43          |
|                        | 2          | 13.02        | 2.03              | 3.04           |
|                        | 3          | 4.55         | 0.21              | 0.42           |
|                        | 4          | 4.49         | 1.75              | 2.93           |
| Improved Grassland     | 1          | 26.61        | 12.00             | 18.60          |
|                        | 2          | 8.26         | 2.60              | 4.44           |
|                        | 3          | 2.70         | 0.26              | 0.54           |
|                        | 4          | 2.10         | 0.31              | 0.52           |
| Semi-natural Grassland | 1          | 30.96        | 8.27              | 15.77          |
|                        | 2          | 18.69        | 3.16              | 7.12           |
|                        | 3          | 8.35         | 1.12              | 3.76           |
|                        | 4          | 5.26         | 1.09              | 3.68           |
| Woodland               | 1          | 49.23        | 4.59              | 4.05           |
|                        | 2          | 33.79        | 4.89              | 4.78           |
|                        | 3          | 14.58        | 2.99              | 2.91           |
|                        | 4          | 13.57        | 1.75              | 5.19           |
| Moorland               | 1          | 51.39        | 7.82              | 7.97           |
|                        | 2          | 33.93        | 4.53              | 5.18           |
|                        | 3          | 16.02        | 1.43              | 2.60           |
|                        | 4          | 12.30        | 0.91              | 4.08           |
| Bog                    | 1          | 44.11        | 10.46             | 9.93           |
|                        | 2          | 30.45        | 3.13              | 5.73           |
|                        | 3          | 12.71        | 1.59              | 1.92           |
|                        | 4          | 9.81         | 1.39              | 2.74           |

**Supplementary Table 11. Effect sizes associated with all samples and samples associates with specific vegetation types relative to a null model based on neutral community assembly for bacteria sampled from topsoil layers and characterised using 454 pyrosequencing or DNA fingerprinting (T-RFLP). The mean and 95% confidence interval of the central tendency (median) and dispersion (interquartile range; IQR) of observed community similarities are presented relative to 100 simulations under the null model.**

| Samples                | Pairwise comparisons (samples) | Data type | Effect size (median) | Lower CI | Upper CI | Effect size (IQR) | Lower CI | Upper CI |
|------------------------|--------------------------------|-----------|----------------------|----------|----------|-------------------|----------|----------|
| All                    | 5778                           | 454       | -0.273               | -0.288   | -0.250   | 0.189             | 0.179    | 0.197    |
|                        | (108)                          | T-RFLP    | -0.091               | -0.128   | -0.050   | 0.053             | 0.042    | 0.061    |
| Arable                 | 136                            | 454       | -0.232               | -0.255   | -0.206   | 0.068             | 0.059    | 0.075    |
|                        | (17)                           | T-RFLP    | -0.007               | -0.047   | 0.038    | 0.024             | -0.003   | 0.049    |
| Improved Grassland     | 378                            | 454       | -0.227               | -0.245   | -0.205   | 0.114             | 0.108    | 0.119    |
|                        | (28)                           | T-RFLP    | -0.002               | -0.041   | 0.036    | 0.053             | 0.037    | 0.063    |
| Semi-natural Grassland | 210                            | 454       | -0.275               | -0.295   | -0.249   | 0.076             | 0.052    | 0.098    |
|                        | (21)                           | T-RFLP    | -0.043               | -0.088   | 0.004    | 0.064             | 0.042    | 0.079    |
| Moorland               | 325                            | 454       | -0.366               | -0.388   | -0.342   | 0.065             | 0.054    | 0.071    |
|                        | (26)                           | T-RFLP    | -0.122               | -0.171   | -0.074   | 0.034             | 0.015    | 0.052    |
| Bog                    | 91                             | 454       | -0.329               | -0.356   | -0.300   | 0.086             | 0.077    | 0.095    |
|                        | (14)                           | T-RFLP    | -0.156               | -0.209   | -0.106   | 0.050             | 0.028    | 0.072    |

**Supplementary Table 12. Number of samples associated with each soil type (major soil groups) based on land use category.**

| Land use               | Soil layer | Alluvial soils | Brown soils | Gley soils | Peat | Podzols | Rankers | Regosols |
|------------------------|------------|----------------|-------------|------------|------|---------|---------|----------|
| Arable                 | 1          | 2              | 8           | 10         | 0    | 14      | 0       | 0        |
|                        | 2          | 2              | 8           | 7          | 0    | 12      | 0       | 0        |
|                        | 3          | 2              | 6           | 6          | 0    | 8       | 0       | 0        |
|                        | 4          | 0              | 0           | 2          | 0    | 4       | 0       | 0        |
| Improved Grassland     | 1          | 6              | 30          | 8          | 0    | 10      | 2       | 0        |
|                        | 2          | 6              | 29          | 8          | 0    | 10      | 0       | 0        |
|                        | 3          | 6              | 23          | 6          | 0    | 6       | 0       | 0        |
|                        | 4          | 4              | 9           | 4          | 0    | 2       | 0       | 0        |
| Semi-natural Grassland | 1          | 2              | 2           | 18         | 6    | 10      | 4       | 2        |
|                        | 2          | 2              | 4           | 28         | 6    | 14      | 5       | 2        |
|                        | 3          | 2              | 3           | 24         | 6    | 12      | 6       | 2        |
|                        | 4          | 0              | 2           | 16         | 2    | 9       | 0       | 2        |
| Woodland               | 1          | 0              | 4           | 2          | 6    | 8       | 1       | 0        |
|                        | 2          | 0              | 10          | 8          | 14   | 22      | 4       | 0        |
|                        | 3          | 0              | 9           | 8          | 14   | 21      | 2       | 0        |
|                        | 4          | 0              | 6           | 8          | 10   | 22      | 0       | 0        |
| Moorland               | 1          | 0              | 0           | 20         | 16   | 20      | 8       | 0        |
|                        | 2          | 0              | 0           | 21         | 18   | 30      | 6       | 0        |
|                        | 3          | 0              | 0           | 18         | 16   | 28      | 0       | 0        |
|                        | 4          | 0              | 0           | 14         | 12   | 20      | 0       | 0        |
| Bog                    | 1          | 0              | 0           | 2          | 45   | 0       | 0       | 0        |
|                        | 2          | 0              | 0           | 4          | 66   | 0       | 0       | 0        |
|                        | 3          | 0              | 0           | 4          | 61   | 0       | 0       | 0        |
|                        | 4          | 0              | 0           | 2          | 29   | 0       | 0       | 0        |

**Supplementary Table 13. PCR primers used in this study.**

| Primer name | Primer sequence        | Reference                     |
|-------------|------------------------|-------------------------------|
| 63F         | AGGCCTAACACATGCAAGTC   | Marchesi et al. <sup>1</sup>  |
| 1087R       | CTCGTTGCGGGACTTAACCC   | Hauben et al. <sup>2</sup>    |
| ITS1F       | CTTGGTCATTTAGAGGAAGTAA | Gardes and Bruns <sup>3</sup> |
| ITS4        | TCCTCCGCTTATTGATATGC   | White et al. <sup>4</sup>     |
| PRK341F     | CCTAYGGGRBGCASCAG      | Cai et al. <sup>5</sup>       |
| PRK806R     | GGACTACNNGGGTATCTAAT   | Cai et al. <sup>5</sup>       |



**Supplementary Table 14. Permutational multivariate analysis of variance results for the ten most important environmental variables, measured independently for each soil layer, for explaining variation in (separately) bacterial and fungal community composition. Terms were entered in the model in the order indicated by forward selection on all environmental variables.**

| Response matrix | Predictor | $R^2$ | Cumulative adjusted $R^2$ | Pseudo- $F$ statistic | $P$ -value |
|-----------------|-----------|-------|---------------------------|-----------------------|------------|
| Bacteria        | pH        | 0.065 | 0.063                     | 41.7                  | 0.001      |
|                 | exch.K    | 0.029 | 0.091                     | 18.5                  | 0.001      |
|                 | exch.Mn   | 0.013 | 0.102                     | 8.5                   | 0.001      |
|                 | exch.Mg   | 0.029 | 0.130                     | 18.8                  | 0.001      |
|                 | N         | 0.010 | 0.139                     | 6.5                   | 0.001      |
|                 | Fe        | 0.012 | 0.149                     | 7.7                   | 0.001      |
|                 | exch.Ca   | 0.007 | 0.155                     | 4.6                   | 0.001      |
|                 | S         | 0.014 | 0.166                     | 8.7                   | 0.001      |
|                 | P         | 0.006 | 0.171                     | 3.6                   | 0.001      |
|                 | exch.Fe   | 0.005 | 0.174                     | 3.1                   | 0.001      |
| Fungi           | pH        | 0.041 | 0.039                     | 27.2                  | 0.001      |
|                 | exch.Mn   | 0.037 | 0.075                     | 24.5                  | 0.001      |
|                 | exch.Na   | 0.016 | 0.088                     | 10.6                  | 0.001      |
|                 | exch.K    | 0.034 | 0.121                     | 22.4                  | 0.001      |
|                 | N         | 0.013 | 0.132                     | 8.4                   | 0.001      |
|                 | P         | 0.007 | 0.137                     | 4.4                   | 0.001      |
|                 | exch.Ca   | 0.008 | 0.143                     | 5.4                   | 0.001      |
|                 | exch.Fe   | 0.005 | 0.147                     | 3.3                   | 0.001      |
|                 | S         | 0.009 | 0.155                     | 6.3                   | 0.001      |
|                 | N.min     | 0.008 | 0.162                     | 5.3                   | 0.001      |

## Supplementary References

1. Marchesi, J. R. *et al.* Design and evaluation of useful bacterium-specific PCR primers that amplify genes coding for bacterial 16s rRNA. *Appl. Environ. Microbiol.* **64**, 795–799 (1998).
2. Hauben, L., Vauterin, L., Swings, J. & Moore, E. R. Comparison of 16S ribosomal DNA sequences of all *Xanthomonas* species. *Int. J. Syst. Bacteriol.* **47**, 328–335 (1997).
3. Gardes, M. & Bruns, T. D. ITS primers with enhanced specificity for basidiomycetes - application to the identification of mycorrhizae and rusts. *Mol. Ecol.* **2**, 113–118 (1993).
4. White, T. J., Bruns, T., Lee, S. & Taylor, J. W. Amplification and direct sequencing of fungal ribosomal RNA genes for phylogenetics. Pp 315-322 in *PCR Protocols: A Guide to Methods and Applications* (Academic Press, Inc., 1990).
5. Cai, L., Ye, L., Tong, A. H. Y., Lok, S. & Zhang, T. Biased diversity metrics revealed by bacterial 16S pyrotags derived from different primer sets. *PLoS ONE* **8**, e53649 (2013).
6. Yao, H. *et al.* Multi-factorial drivers of ammonia oxidizer communities: evidence from a national soil survey. *Environ. Microbiol.* **15**, 2545–2556 (2013).
